# Supplementary material for: Gene expression network analysis reveals new transcriptional regulators as novel factors in human ischemic cardiomyopathy
Source: PubMed Central journal article supplement (PMC4386080; doi:10.1186/s12920-015-0088-y), 2015-03-29
Supplement: 12920_2015_88_MOESM1_ESM.pdf [file 12920_2015_88_MOESM1_ESM.pdf]

## Stats

Supplementary information, Table S1 Sequencing quality control information

| <b>Samples</b> | <b>Total Reads</b> | <b>Total Mapping_Reads</b> | <b>%_Mapping_Reads</b> | <b>Total Pair_Reads</b> | <b>%Pair_REads</b> | <b>Total Singleton</b> | <b>%Singleton</b> |
|----------------|--------------------|----------------------------|------------------------|-------------------------|--------------------|------------------------|-------------------|
| ICM1           | 79627435           | 69222689                   | 86,93                  | 63815626                | 80,14              | 5407063                | 6,79              |
| ICM2           | 72851618           | 63166520                   | 86,71                  | 56826404                | 78,00              | 6340116                | 8,70              |
| ICM3           | 68672803           | 60683057                   | 88,37                  | 56681942                | 82,54              | 4001115                | 5,83              |
| ICM4           | 89154353           | 77327829                   | 86,73                  | 70335486                | 78,89              | 6992343                | 7,84              |
| ICM5           | 94001798           | 81444627                   | 86,64                  | 74961670                | 79,74              | 6482957                | 6,90              |
| ICM6           | 70182024           | 61698788                   | 87,91                  | 57304894                | 81,65              | 4393894                | 6,26              |
| ICM7           | 64467419           | 57624400                   | 89,39                  | 53914378                | 83,63              | 3710022                | 5,75              |
| ICM8           | 94026479           | 82280585                   | 87,51                  | 76300360                | 81,15              | 5980225                | 6,36              |
| ICM9           | 134287858          | 119536215                  | 89,01                  | 111245252               | 82,84              | 8290963                | 6,17              |
| ICM10          | 88994932           | 77349908                   | 86,91                  | 70484676                | 79,20              | 6865232                | 7,71              |
| ICM11          | 62756879           | 55191022                   | 87,94                  | 51490044                | 82,05              | 3700978                | 5,90              |
| ICM12          | 45112281           | 39848175                   | 88,33                  | 36715276                | 81,39              | 3132899                | 6,94              |
| ICM13          | 37013820           | 31324815                   | 84,63                  | 27633082                | 74,66              | 3691733                | 9,97              |
| CNT1           | 60963425           | 54685395                   | 89,70                  | 51472396                | 84,43              | 3212999                | 5,27              |
| CNT2           | 92662648           | 80711239                   | 87,10                  | 74044596                | 79,91              | 6666643                | 7,19              |
| CNT3           | 75520116           | 66234945                   | 87,71                  | 61401482                | 81,30              | 4833463                | 6,40              |
| CNT4           | 87468430           | 75599010                   | 86,43                  | 68145420                | 77,91              | 7453590                | 8,52              |
| CNT5           | 85559883           | 76076899                   | 88,92                  | 71274244                | 83,30              | 4802655                | 5,61              |
| CNT6           | 81326487           | 68887015                   | 84,70                  | 60632874                | 74,55              | 8254141                | 10,15             |
