# Supplementary material for: Gene expression network analysis reveals new transcriptional regulators as novel factors in human ischemic cardiomyopathy
Source: PubMed Central journal article supplement (PMC4386080; doi:10.1186/s12920-015-0088-y), 2015-03-29
Supplement: 12920_2015_88_MOESM3_ESM.pdf [file 12920_2015_88_MOESM3_ESM.pdf]

## TF represented in ICM transcriptome signature

| Transcription Factor- PMID | Number of Targets | x-fold Enrichment | p-Value     |
|----------------------------|-------------------|-------------------|-------------|
| TRIM28-21343339            | 17                | 7,06              | 2,699E-09   |
| IRF8-22096565-A            | 37                | 6,81              | 0           |
| RBPJ-22232070              | 5                 | 5,49              | 0,00328648  |
| IRF1-21803131              | 50                | 5,41              | 0           |
| FOXM1-23109430             | 31                | 4,34              | 8,5E-11     |
| RELA-24523406              | 137               | 4,33              | 0           |
| ESR1-21235772              | 24                | 3,93              | 6,0756E-08  |
| STAT3-22323479             | 4                 | 3,93              | 0,023428113 |
| TRP63-18441228             | 15                | 3,92              | 1,82011E-05 |
| VDR-20736230               | 24                | 3,9               | 7,0559E-08  |
| PPARD-23176727             | 20                | 3,85              | 1,00648E-06 |
| EGR1-19374776              | 7                 | 3,84              | 0,003413007 |
| TP63-17297297              | 4                 | 3,73              | 0,027287731 |
| AR-21909140                | 29                | 3,63              | 1,3254E-08  |
| CLOCK-20551151             | 39                | 3,58              | 6,7E-11     |
| NR1H3-23393188             | 55                | 3,43              | 0           |
| ESR2-21235772              | 38                | 3,35              | 6,74E-10    |
| BACH1-22875853             | 121               | 3,34              | 0           |
| SMAD-19615063              | 11                | 3,31              | 0,000851595 |
| EZH2-18974828              | 111               | 3,19              | 0           |
| RNF2-18974828              | 111               | 3,19              | 0           |
| EED-16625203               | 70                | 3,15              | 0           |
| SUZ12-18692474             | 161               | 3,15              | 0           |
| SUZ12-18974828             | 163               | 3,15              | 0           |
| STAT5-23275557             | 100               | 3,12              | 0           |
| SUZ12-16625203             | 106               | 3,12              | 0           |
| JARID2-20075857            | 104               | 3,09              | 0           |
| CEBPD-23245923             | 41                | 3,04              | 2,033E-09   |
| CEBPB-23403033             | 31                | 3,03              | 1,91606E-07 |
| HIF1A-21447827             | 26                | 3,02              | 1,8656E-06  |
| EOMES-21245162             | 75                | 3                 | 0           |
| SOX2-18555785              | 40                | 3                 | 4,216E-09   |
| TP53-20018659              | 90                | 2,99              | 0           |
| CEBPA-23403033             | 47                | 2,98              | 2,46E-10    |
| JARID2-20064375            | 89                | 2,97              | 0           |
| SOX9-22984422              | 5                 | 2,96              | 0,032236086 |
| MTF2-20144788              | 236               | 2,95              | 0           |
| BMI1-19503595              | 52                | 2,94              | 4,4E-11     |
| THRA-23701648              | 14                | 2,92              | 0,000582492 |
| SOX2-20726797              | 200               | 2,91              | 0           |
| NFE2L2-20460467            | 82                | 2,9               | 0           |
| NRF2-20460467              | 82                | 2,9               | 0           |
| SUZ12-18555785             | 82                | 2,89              | 0           |
| SUZ12-20075857             | 337               | 2,89              | 0           |
| MYB-21317192               | 71                | 2,87              | 0           |
| STAT3-1855785              | 44                | 2,87              | 2,587E-09   |
| ATF3-23680149              | 167               | 2,85              | 0           |
| RNF2-16625203              | 93                | 2,85              | 0           |

|                    |     |      |             |
|--------------------|-----|------|-------------|
| SCL-21571218       | 135 | 2,82 | 0           |
| WT1-19549856       | 15  | 2,81 | 0,000540353 |
| NR3C1-23031785     | 69  | 2,8  | 0           |
| ESR1-17901129      | 33  | 2,77 | 5,03446E-07 |
| NR3C1-21868756     | 83  | 2,74 | 0           |
| PHC1-16625203      | 67  | 2,71 | 2E-12       |
| GATA2-21571218     | 80  | 2,69 | 0           |
| IRF8-21731497      | 23  | 2,69 | 3,98366E-05 |
| RARG-19884340      | 28  | 2,68 | 6,5745E-06  |
| GABP-19822575      | 96  | 2,67 | 0,001319712 |
| ZNF652-21678463    | 8   | 2,67 | 0,013480992 |
| TP53-18474530      | 59  | 2,66 | 8,3E-11     |
| SOX2-18358816      | 56  | 2,66 | 2,51E-10    |
| BMI1-23680149      | 75  | 2,65 | 0           |
| VDR-23401126       | 17  | 2,65 | 0,000445136 |
| SOX9-24532713      | 98  | 2,64 | 0           |
| PAX3-FKHR-20663909 | 75  | 2,63 | 0           |
| NFE2L2-22581777    | 37  | 2,62 | 3,87755E-07 |
| IRF8-22096565      | 54  | 2,61 | 1,005E-09   |
| GATA2-21666600     | 58  | 2,59 | 3,36E-10    |
| CDX2-20551321      | 35  | 2,59 | 1,00044E-06 |
| NOTCH1-21737748    | 17  | 2,59 | 0,000578588 |
| SMAD3-21741376     | 101 | 2,58 | 0           |
| CDX2-19796622      | 23  | 2,57 | 7,65077E-05 |
| TET1-21490601      | 137 | 2,56 | 0           |
| SALL4-18804426     | 69  | 2,56 | 1,1E-11     |
| ZIC3-20872845      | 25  | 2,56 | 4,13974E-05 |
| TP63-23658742      | 248 | 2,53 | 0           |
| CTNNB1-20460455    | 67  | 2,53 | 3,4E-11     |
| AR-22383394        | 124 | 2,49 | 0           |
| RCOR3-21632747     | 190 | 2,49 | 0           |
| NANOG-18700969     | 23  | 2,49 | 0,000115399 |
| GBX2-23144817      | 19  | 2,48 | 0,00046919  |
| NACC1-18358816     | 51  | 2,47 | 1,4935E-08  |
| FOXO1-23066095     | 23  | 2,47 | 0,000130078 |
| GATA1-21571218     | 171 | 2,45 | 0           |
| KLF1-20508144      | 75  | 2,45 | 1E-11       |
| DNAJC2-21179169    | 59  | 2,45 | 1,605E-09   |
| STAT1-20625510     | 43  | 2,45 | 2,67171E-07 |
| FOXA2-19822575     | 194 | 2,44 | 0           |
| SMAD4-21799915     | 161 | 2,44 | 0           |
| ESR1-20079471      | 14  | 2,42 | 0,003054741 |
| TP53-22127205      | 63  | 2,41 | 7,95E-10    |
| PPARD-21283829     | 222 | 2,4  | 0           |
| RAD21-21589869     | 131 | 2,4  | 0           |
| WT1-20215353       | 107 | 2,4  | 0           |
| EWS-FLI1-20517297  | 37  | 2,4  | 2,56186E-06 |
| NANOG-18347094     | 122 | 2,39 | 0           |
| ZFP281-18358816    | 37  | 2,39 | 2,97482E-06 |
| MYCN-19997598      | 15  | 2,39 | 0,002446415 |

|                  |     |      |             |
|------------------|-----|------|-------------|
| KLF4-19030024    | 96  | 2,38 | 0           |
| SPI1-20176806    | 105 | 2,37 | 0           |
| STAT4-19710469   | 123 | 2,37 | 0           |
| ELK1-22589737    | 59  | 2,37 | 4,775E-09   |
| DROSHA-22980978  | 29  | 2,37 | 3,75201E-05 |
| PRDM14-21183938  | 123 | 2,36 | 0           |
| STAT3-23295773   | 200 | 2,36 | 0           |
| CEBPB-20176806   | 100 | 2,35 | 0           |
| SMAD2-18955504   | 122 | 2,35 | 0           |
| SMAD3-18955504   | 122 | 2,35 | 0           |
| YAP1-20516196    | 147 | 2,35 | 0           |
| TP53-22573176    | 85  | 2,35 | 3E-12       |
| OLIG2-23332759   | 128 | 2,34 | 0           |
| FOXP2-23625967   | 54  | 2,33 | 3,5038E-08  |
| EGR1-20690147    | 386 | 2,32 | 0           |
| SMARCA4-23332759 | 156 | 2,31 | 0           |
| KLF4-18358816    | 105 | 2,3  | 0           |
| SMAD4-21741376   | 169 | 2,3  | 0           |
| MYC-18940864     | 46  | 2,3  | 5,23185E-07 |
| POU5F1-18700969  | 35  | 2,3  | 1,13189E-05 |
| EGR1-19032775    | 17  | 2,3  | 0,001948859 |
| TP63-22573176    | 260 | 2,29 | 0           |
| TCF3-18347094    | 136 | 2,28 | 0           |
| EBNA2-21746931   | 91  | 2,28 | 3E-12       |
| RUNX1-17652178   | 61  | 2,27 | 1,2192E-08  |
| AHR-22903824     | 42  | 2,27 | 2,19027E-06 |
| GATA1-19941827   | 111 | 2,26 | 0           |
| MITF-21258399    | 338 | 2,26 | 0           |
| RUNX2-22187159   | 207 | 2,26 | 0           |
| LMO2-20887958    | 105 | 2,25 | 0           |
| NROB1-18358816   | 102 | 2,25 | 0           |
| REST-21632747    | 141 | 2,25 | 0           |
| TAL1-20566737    | 113 | 2,25 | 0           |
| TTF2-22483619    | 91  | 2,25 | 5E-12       |
| SOX2-19030024    | 52  | 2,25 | 1,8923E-07  |
| MECOM-23826213   | 117 | 2,24 | 0           |
| POU3F2-20337985  | 102 | 2,24 | 0           |
| PPARG-20887899   | 214 | 2,24 | 0           |
| SOX2-21211035    | 205 | 2,24 | 0           |
| STAT3-18555785   | 120 | 2,24 | 0           |
| STAT3-19079543   | 57  | 2,24 | 5,2668E-08  |
| TP53-16413492    | 27  | 2,24 | 0,000162352 |
| TP53-23651856    | 191 | 2,23 | 0           |
| TFAP2C-20629094  | 72  | 2,23 | 1,112E-09   |
| ELF1-20517297    | 61  | 2,23 | 2,1572E-08  |
| PPARG-20176806   | 50  | 2,23 | 4,11691E-07 |
| NOTCH1-17114293  | 8   | 2,23 | 0,032983874 |
| TCF4-18268006    | 28  | 2,22 | 0,000143571 |
| FOXP1-21924763   | 221 | 2,21 | 0           |
| ZFP281-18757296  | 119 | 2,21 | 0           |

|                    |     |      |             |
|--------------------|-----|------|-------------|
| SPI1-20517297      | 74  | 2,21 | 9,84E-10    |
| ERG-20517297       | 63  | 2,21 | 1,6786E-08  |
| ERG-21242973       | 19  | 2,21 | 0,001686265 |
| ESR1-22446102      | 113 | 2,2  | 0           |
| GATA2-20887958     | 102 | 2,2  | 0           |
| ELF5-23300383      | 64  | 2,2  | 1,6824E-08  |
| GATA1-19941826     | 57  | 2,2  | 9,8282E-08  |
| FOXO3-23340844     | 41  | 2,2  | 5,87837E-06 |
| SMAD1-18555785     | 36  | 2,2  | 2,10899E-05 |
| JUN-21703547       | 93  | 2,19 | 1,1E-11     |
| HNF4A-19761587     | 66  | 2,19 | 1,1806E-08  |
| NANOG-18358816     | 72  | 2,18 | 2,853E-09   |
| RBPJ-21746931      | 117 | 2,17 | 0           |
| NANOG-18692474     | 177 | 2,16 | 0           |
| CTCF-18555785      | 90  | 2,14 | 6,8E-11     |
| SPI1-23547873      | 183 | 2,13 | 0           |
| SOX17-20123909     | 111 | 2,13 | 1E-12       |
| LYL1-20887958      | 43  | 2,13 | 7,2831E-06  |
| HNF4A-19822575     | 346 | 2,12 | 0           |
| SOX2-18692474      | 189 | 2,12 | 0           |
| SIN3A-21632747     | 67  | 2,11 | 3,4549E-08  |
| EZH2-23942234      | 53  | 2,11 | 8,4213E-07  |
| MYC-22102868       | 45  | 2,11 | 6,10443E-06 |
| SIN3B-21632747     | 242 | 2,1  | 0           |
| TCF4-23295773      | 215 | 2,1  | 0           |
| XRN2-22483619      | 86  | 2,1  | 4,65E-10    |
| MYC-20876797       | 79  | 2,1  | 2,532E-09   |
| POU5F1-16153702    | 35  | 2,1  | 6,73439E-05 |
| PPARD-23208498     | 29  | 2,1  | 0,000277462 |
| SRY-22984422       | 11  | 2,1  | 0,019879085 |
| PBX1-22567123      | 129 | 2,09 | 0           |
| EGR1-23403033      | 53  | 2,09 | 1,10217E-06 |
| NANOG-21062744     | 47  | 2,09 | 4,79271E-06 |
| IRF1-19129219      | 11  | 2,09 | 0,020518974 |
| TFAP2A-17053090    | 106 | 2,08 | 7E-12       |
| RUNX1-21571218     | 281 | 2,07 | 0           |
| EP300-20729851     | 116 | 2,07 | 1E-12       |
| SOX11-23321250     | 63  | 2,07 | 1,54393E-07 |
| AR-19668381        | 193 | 2,05 | 0           |
| TCF7-22412390      | 84  | 2,05 | 2,105E-09   |
| TCFAP2C-20176728   | 146 | 2,04 | 0           |
| TAF7L-23326641     | 50  | 2,04 | 4,10528E-06 |
| FLI1-21571218      | 318 | 2,03 | 0           |
| SALL4-18804426_ESC | 58  | 2,03 | 8,71287E-07 |
| NR1I2-20693526     | 51  | 2,03 | 4,22287E-06 |
| CNOT3-19339689     | 84  | 2,02 | 3,501E-09   |
| TCF3-18692474      | 73  | 2,02 | 4,553E-08   |
| E2F1-21310950      | 62  | 2,02 | 4,41235E-07 |
| SREBP1-19666523    | 40  | 2,02 | 4,62197E-05 |
| TET1-21451524      | 99  | 2,01 | 2,04E-10    |

|                   |     |      |             |
|-------------------|-----|------|-------------|
| SOX2-16153702     | 69  | 2,01 | 1,0981E-07  |
| GATA3-20176728    | 45  | 2,01 | 1,77165E-05 |
| CRX-20693478      | 36  | 2,01 | 0,000120373 |
| HSF1-23293686     | 62  | 2    | 5,97082E-07 |
| RUNX1-20887958    | 60  | 2    | 9,37591E-07 |
| NANOG-18555785    | 29  | 2    | 0,000586162 |
| POU5F1-18692474   | 226 | 1,99 | 0           |
| SPI1-23127762     | 74  | 1,99 | 6,2612E-08  |
| EP300-21415370    | 54  | 1,99 | 3,82217E-06 |
| RUNX1-22412390    | 94  | 1,98 | 1,144E-09   |
| GATA2-19941826    | 127 | 1,97 | 2E-12       |
| SETDB1-19884257   | 124 | 1,97 | 3E-12       |
| DCP1A-22483619    | 40  | 1,97 | 7,97078E-05 |
| GATA1-22025678    | 2   | 1,96 | 0,279906022 |
| DMRT1-23473982    | 108 | 1,94 | 1,7E-10     |
| SETDB1-19884255   | 105 | 1,94 | 3,58E-10    |
| POU5F1-18347094   | 126 | 1,93 | 0,000140102 |
| ESRRB-18555785    | 74  | 1,92 | 2,02867E-07 |
| YY1-22570637      | 54  | 1,92 | 9,51691E-06 |
| ARNT-22903824     | 53  | 1,92 | 1,13109E-05 |
| PPARG-19300518    | 14  | 1,92 | 0,018765628 |
| AR-20517297       | 105 | 1,91 | 7,12E-10    |
| STAT6-20620947    | 26  | 1,91 | 0,001968013 |
| CREB1-20920259    | 156 | 1,9  | 0           |
| PAX6-23342162     | 51  | 1,9  | 2,1574E-05  |
| MYC-19915707      | 151 | 1,89 | 0           |
| FOXP2-21765815    | 59  | 1,89 | 5,8136E-06  |
| E2F1-17053090     | 87  | 1,88 | 4,5759E-08  |
| ASH2L-23239880    | 167 | 1,87 | 0           |
| SMARCA4-20176728  | 56  | 1,87 | 1,37225E-05 |
| PHF8-20622854     | 74  | 1,85 | 7,95446E-07 |
| TRIM28-19339689   | 152 | 1,84 | 1E-12       |
| PDX1-19855005     | 33  | 1,84 | 0,000963896 |
| SMAD4-19686287    | 20  | 1,84 | 0,008726319 |
| GFI1B-20887958    | 92  | 1,83 | 5,4793E-08  |
| CREB1-23762244    | 117 | 1,82 | 1,046E-09   |
| FLI1-20887958     | 99  | 1,82 | 2,4485E-08  |
| SPI1-22096565     | 82  | 1,82 | 3,5756E-07  |
| MEIS1-20887958    | 71  | 1,82 | 2,23317E-06 |
| SALL4-22934838    | 69  | 1,81 | 3,70611E-06 |
| CCND1-20090754    | 103 | 1,8  | 2,2056E-08  |
| TCFCP2L1-18555785 | 96  | 1,8  | 6,1062E-08  |
| EWS-ERG-20517297  | 50  | 1,8  | 9,75086E-05 |
| TFEB-21752829     | 39  | 1,8  | 0,000524123 |
| TAL1-20887958     | 99  | 1,79 | 5,5855E-08  |
| E2F4-21247883     | 143 | 1,78 | 6,2E-11     |
| KLF4-18555785     | 117 | 1,78 | 3,286E-09   |
| TEAD4-22529382    | 109 | 1,77 | 1,6685E-08  |
| SREBP2-21459322   | 52  | 1,77 | 0,000100005 |
| REST-18959480     | 134 | 1,74 | 9,32E-10    |

|                 |     |      |             |
|-----------------|-----|------|-------------|
| SPI1-22790984   | 91  | 1,73 | 7,26343E-07 |
| NKX2-5-21415370 | 70  | 1,73 | 1,33887E-05 |
| GATA4-21415370  | 94  | 1,72 | 6,08593E-07 |
| EOMES-20176728  | 79  | 1,69 | 8,88092E-06 |
| PADI4-21655091  | 47  | 1,69 | 0,000556963 |
| BCL3-23251550   | 39  | 1,69 | 0,001499947 |
| E2F1-18555785   | 188 | 1,68 | 4E-12       |
| TBX3-20139965   | 48  | 1,68 | 0,000581266 |
| POU5F1-18555785 | 25  | 1,68 | 0,010656655 |
| TBX5-21415370   | 102 | 1,66 | 9,9634E-07  |
| NANOG-16153702  | 74  | 1,64 | 4,52198E-05 |
| POU5F1-16518401 | 68  | 1,64 | 9,23076E-05 |
| MYC-19079543    | 64  | 1,64 | 0,000144894 |
| E2F4-17652178   | 44  | 1,64 | 0,001480245 |
| DACH1-20351289  | 74  | 1,62 | 5,60014E-05 |
| SRF-21415370    | 71  | 1,62 | 8,5858E-05  |
| MYC-19030024    | 167 | 1,61 | 1,737E-09   |
| TCF3-18467660   | 60  | 1,61 | 0,000335641 |
| HTT-18923047    | 24  | 1,58 | 0,022587722 |
| MYCN-18555785   | 95  | 1,57 | 1,98299E-05 |
| FOXP3-21729870  | 59  | 1,57 | 0,000723803 |
| SFP11-20887958  | 98  | 1,54 | 2,61674E-05 |
| MEF2A-21415370  | 43  | 1,53 | 0,005298152 |
| KDM5B-21448134  | 152 | 1,52 | 2,90204E-07 |
| TBP-23326641    | 43  | 1,52 | 0,006083723 |
| ASXL1-24218140  | 33  | 1,52 | 0,013886591 |
| ELK1-19687146   | 37  | 1,5  | 0,011608856 |
| CUX1-19635798   | 122 | 1,49 | 1,20788E-05 |
| MYBL2-22936984  | 90  | 1,49 | 0,00016923  |
| ERG-20887958    | 79  | 1,49 | 0,000383439 |
| RCOR2-21632747  | 16  | 1,49 | 0,081848417 |
| NANOG-16518401  | 140 | 1,48 | 3,36423E-06 |
| VDR-23849224    | 88  | 1,47 | 0,000307585 |
| EKLF-21900194   | 49  | 1,47 | 0,005926467 |
| CREM-20920259   | 226 | 1,46 | 6,549E-09   |
| ZFP42-18358816  | 58  | 1,46 | 0,003534211 |
| HOXB4-20404135  | 70  | 1,43 | 0,002367339 |
| MYC-18358816    | 130 | 1,42 | 5,2574E-05  |
| FOXO3-22982991  | 76  | 1,42 | 0,002015453 |
| PRDM5-23873026  | 39  | 1,41 | 0,023169689 |
| REST-19997604   | 71  | 1,25 | 0,035350387 |
| MYC-18555785    | 37  | 1,15 | 0,216529521 |
| ZFX-18555785    | 89  | 1,02 | 0,425417455 |
| MYCN-21190229   | 20  | 1,3  | 0,003786975 |
