# Supplementary material for: Gene expression network analysis reveals new transcriptional regulators as novel factors in human ischemic cardiomyopathy
Source: PubMed Central journal article supplement (PMC4386080; doi:10.1186/s12920-015-0088-y), 2015-03-29
Supplement: 12920_2015_88_MOESM4_ESM.pdf [file 12920_2015_88_MOESM4_ESM.pdf]

**CEBPD target genes**

| Gene ID         | FOLD CHANGE  | PVALUE   | Official Gene Symbol | Gene description                                                                                                |
|-----------------|--------------|----------|----------------------|-----------------------------------------------------------------------------------------------------------------|
| ENSG00000184557 | -3,936181585 | 3,01E-13 | SOCS3                | suppressor of cytokine signaling 3 [Source:HGNC Symbol;Acc:19391]                                               |
| ENSG00000139117 | -1,823626579 | 5,87E-06 | CPNE8                | copine VIII [Source:HGNC Symbol;Acc:23498]                                                                      |
| ENSG00000177508 | -1,902365332 | 9,55E-05 | IRX3                 | iroquois homeobox 3 [Source:HGNC Symbol;Acc:14360]                                                              |
| ENSG00000140285 | -1,888658236 | 0,000583 | FGF7                 | fibroblast growth factor 7 [Source:HGNC Symbol;Acc:3685]                                                        |
| ENSG00000162618 | -1,657984806 | 0,000624 | ELTD1                | EGF, latrophilin and seven transmembrane domain containing 1 [Source:HGNC Symbol;Acc:20822]                     |
| ENSG00000163513 | -2,099039915 | 0,000799 | TGFBR2               | transforming growth factor, beta receptor II (70/80kDa) [Source:HGNC Symbol;Acc:11773]                          |
| ENSG00000197299 | -1,510732633 | 0,00091  | BLM                  | Bloom syndrome, RecQ helicase-like [Source:HGNC Symbol;Acc:1058]                                                |
| ENSG00000163249 | -1,569164777 | 0,003237 | CCNYL1               | cyclin Y-like 1 [Source:HGNC Symbol;Acc:26868]                                                                  |
| ENSG00000163050 | -1,586641689 | 0,004417 | ADCK3                | aarF domain containing kinase 3 [Source:HGNC Symbol;Acc:16812]                                                  |
| ENSG00000116761 | -1,649476938 | 0,006115 | CTH                  | cystathionase (cystathionine gamma-lyase) [Source:HGNC Symbol;Acc:2501]                                         |
| ENSG00000170289 | -2,039936316 | 0,008523 | CNGB3                | cyclic nucleotide gated channel beta 3 [Source:HGNC Symbol;Acc:2153]                                            |
| ENSG00000148948 | -1,97841214  | 0,009179 | LRRC4C               | leucine rich repeat containing 4C [Source:HGNC Symbol;Acc:29317]                                                |
| ENSG00000182175 | -1,605916839 | 0,010756 | RGMA                 | RGM domain family, member A [Source:HGNC Symbol;Acc:30308]                                                      |
| ENSG00000170961 | -1,614898884 | 0,012723 | HAS2                 | hyaluronan synthase 2 [Source:HGNC Symbol;Acc:4819]                                                             |
| ENSG00000138696 | -1,99922964  | 0,013427 | BMPRI1B              | bone morphogenetic protein receptor, type IB [Source:HGNC Symbol;Acc:1077]                                      |
| ENSG00000164442 | -1,563132637 | 0,021459 | CITED2               | Cbp/p300-interacting transactivator, with Glu/Asp-rich carboxy-terminal domain, 2 [Source:HGNC Symbol;Acc:1987] |
| ENSG00000141655 | -1,62706379  | 0,022777 | TNFRSF11A            | tumor necrosis factor receptor superfamily, member 11a, NFKB activator [Source:HGNC Symbol;Acc:11908]           |
| ENSG00000125538 | -2,146458985 | 0,022657 | IL1B                 | interleukin 1, beta [Source:HGNC Symbol;Acc:5992]                                                               |
| ENSG00000064989 | -2,014143567 | 0,028037 | CALCRL               | calcitonin receptor-like [Source:HGNC Symbol;Acc:16709]                                                         |
| ENSG00000104312 | -1,694701336 | 0,029718 | RIPK2                | receptor-interacting serine-threonine kinase 2 [Source:HGNC Symbol;Acc:10020]                                   |
| ENSG00000139155 | -1,764781775 | 0,032675 | SLCO1C1              | solute carrier organic anion transporter family, member 1C1 [Source:HGNC Symbol;Acc:13819]                      |
| ENSG00000133105 | -4,651964898 | 0,03446  | RXFP2                | relaxin/insulin-like family peptide receptor 2 [Source:HGNC Symbol;Acc:17318]                                   |
| ENSG00000118007 | -1,5275692   | 0,040834 | STAG1                | stromal antigen 1 [Source:HGNC Symbol;Acc:11354]                                                                |
| ENSG00000049192 | -1,736398196 | 0,046526 | ADAMTS6              | ADAM metallopeptidase with thrombospondin type 1 motif, 6 [Source:HGNC Symbol;Acc:222]                          |
| ENSG00000188779 | -2,257180104 | 0,048715 | SKOR1                | SKI family transcriptional corepressor 1 [Source:HGNC Symbol;Acc:21326]                                         |

**BCL3 target genes**

| Gene ID         | FOLD CHANGE  | PVALUE   | Ofical Gene Symbol | Gene description                                                                                                        |
|-----------------|--------------|----------|--------------------|-------------------------------------------------------------------------------------------------------------------------|
| ENSG00000162645 | -4,026389398 | 8,40E-11 | GBP2               | guanylate binding protein 2, interferon-inducible [Source:HGNC Symbol;Acc:4183]                                         |
| ENSG00000168394 | -4,224240364 | 1,88E-10 | TAP1               | transporter 1, ATP-binding cassette, sub-family B (MDR/TAP) [Source:HGNC Symbol;Acc:43]                                 |
| ENSG00000157557 | -2,233785738 | 2,12E-09 | ETS2               | v-ets erythroblastosis virus E26 oncogene homolog 2 (avian) [Source:HGNC Symbol;Acc:3489]                               |
| ENSG00000108691 | -4,05444967  | 5,86E-09 | CCL2               | chemokine (C-C motif) ligand 2 [Source:HGNC Symbol;Acc:10618]                                                           |
| ENSG00000119917 | -4,184667897 | 1,65E-08 | IFIT3              | interferon-induced protein with tetratricopeptide repeats 3 [Source:HGNC Symbol;Acc:5411]                               |
| ENSG00000184661 | -3,2712696   | 7,58E-08 | CDCA2              | cell division cycle associated 2 [Source:HGNC Symbol;Acc:14623]                                                         |
| ENSG00000075426 | -2,16103174  | 6,98E-07 | FOSL2              | FOS-like antigen 2 [Source:HGNC Symbol;Acc:3798]                                                                        |
| ENSG00000130595 | 2,683163833  | 9,47E-07 | TNNT3              | troponin T type 3 (skeletal, fast) [Source:HGNC Symbol;Acc:11950]                                                       |
| ENSG00000119922 | -3,415184038 | 1,38E-06 | IFIT2              | interferon-induced protein with tetratricopeptide repeats 2 [Source:HGNC Symbol;Acc:5409]                               |
| ENSG00000069702 | -1,773702782 | 2,93E-06 | TGFBR3             | transforming growth factor, beta receptor III [Source:HGNC Symbol;Acc:11774]                                            |
| ENSG00000169245 | -7,105409001 | 3,19E-06 | CXCL10             | chemokine (C-X-C motif) ligand 10 [Source:HGNC Symbol;Acc:10637]                                                        |
| ENSG00000117289 | 1,837725205  | 6,17E-06 | TXNIP              | thioredoxin interacting protein [Source:HGNC Symbol;Acc:16952]                                                          |
| ENSG00000183486 | -2,048529393 | 8,24E-06 | MX2                | myxovirus (influenza virus) resistance 2 (mouse) [Source:HGNC Symbol;Acc:7533]                                          |
| ENSG00000156587 | -2,718296028 | 1,05E-05 | UBE2L6             | ubiquitin-conjugating enzyme E2L 6 [Source:HGNC Symbol;Acc:12490]                                                       |
| ENSG00000184489 | -1,574721142 | 1,41E-05 | PTP4A3             | protein tyrosine phosphatase type IVA, member 3 [Source:HGNC Symbol;Acc:9636]                                           |
| ENSG00000119411 | -3,355224851 | 3,31E-05 | BSPRY              | B-box and SPRY domain containing [Source:HGNC Symbol;Acc:18232]                                                         |
| ENSG00000165029 | -1,880320573 | 4,19E-05 | ABCA1              | ATP-binding cassette, sub-family A (ABC1), member 1 [Source:HGNC Symbol;Acc:29]                                         |
| ENSG00000184205 | -1,925337838 | 4,97E-05 | TSPYL2             | TSPY-like 2 [Source:HGNC Symbol;Acc:24358]                                                                              |
| ENSG00000135899 | -2,086668359 | 7,49E-05 | SP110              | SP110 nuclear body protein [Source:HGNC Symbol;Acc:5401]                                                                |
| ENSG00000148677 | 1,654003479  | 0,000192 | ANKRD1             | ankyrin repeat domain 1 (cardiac muscle) [Source:HGNC Symbol;Acc:15819]                                                 |
| ENSG00000137094 | 1,614090018  | 0,000653 | DNAJB5             | DnaJ (Hsp40) homolog, subfamily B, member 5 [Source:HGNC Symbol;Acc:14887]                                              |
| ENSG00000172156 | -2,886865002 | 0,000754 | CCL11              | chemokine (C-C motif) ligand 11 [Source:HGNC Symbol;Acc:10610]                                                          |
| ENSG00000123358 | -1,856502551 | 0,000792 | NR4A1              | nuclear receptor subfamily 4, group A, member 1 [Source:HGNC Symbol;Acc:7980]                                           |
| ENSG00000163513 | -2,099039915 | 0,000799 | TGFBR2             | transforming growth factor, beta receptor II (70/80kDa) [Source:HGNC Symbol;Acc:11773]                                  |
| ENSG00000170581 | -2,363929113 | 0,000896 | STAT2              | signal transducer and activator of transcription 2, 113kDa [Source:HGNC Symbol;Acc:11363]                               |
| ENSG00000240065 | -2,133089048 | 0,001144 | PSMB9              | proteasome (prosome, macropain) subunit, beta type, 9 (large multifunctional peptidase 2) [Source:HGNC Symbol;Acc:9546] |
| ENSG00000213145 | 1,99904007   | 0,001347 | CRIP1              | cysteine-rich protein 1 (intestinal) [Source:HGNC Symbol;Acc:2360]                                                      |
| ENSG00000126803 | 2,378118675  | 0,001392 | HSPA2              | heat shock 70kDa protein 2 [Source:HGNC Symbol;Acc:5235]                                                                |
| ENSG00000137193 | -1,642882368 | 0,001858 | PIM1               | pim-1 oncogene [Source:HGNC Symbol;Acc:8986]                                                                            |
| ENSG00000168453 | 3,243819608  | 0,002148 | HR                 | hair growth associated [Source:HGNC Symbol;Acc:5172]                                                                    |
| ENSG00000103150 | 1,740888866  | 0,002376 | MLYCD              | malonyl-CoA decarboxylase [Source:HGNC Symbol;Acc:7150]                                                                 |
| ENSG00000143458 | 1,56257234   | 0,002571 | GABPB2             | GA binding protein transcription factor, beta subunit 2 [Source:HGNC Symbol;Acc:28441]                                  |
| ENSG00000119508 | -2,030754336 | 0,002609 | NR4A3              | nuclear receptor subfamily 4, group A, member 3 [Source:HGNC Symbol;Acc:7982]                                           |
| ENSG00000057019 | 1,787913544  | 0,002819 | DCBLD2             | discoidin, CUB and LCCL domain containing 2 [Source:HGNC Symbol;Acc:24627]                                              |
| ENSG00000159459 | 1,531182389  | 0,003941 | UBR1               | ubiquitin protein ligase E3 component n-recogin 1 [Source:HGNC Symbol;Acc:16808]                                        |
| ENSG00000188176 | -1,667649123 | 0,004921 | SMTNL2             | smoothenin-like 2 [Source:HGNC Symbol;Acc:24764]                                                                        |
| ENSG00000170653 | -1,597424915 | 0,005614 | ATF7               | activating transcription factor 7 [Source:HGNC Symbol;Acc:792]                                                          |
| ENSG00000047457 | -2,221413416 | 0,005754 | CP                 | ceruloplasmin (ferroxidase) [Source:HGNC Symbol;Acc:2295]                                                               |
| ENSG00000112936 | -2,107151542 | 0,006362 | C7                 | complement component 7 [Source:HGNC Symbol;Acc:1346]                                                                    |
| ENSG00000196154 | -1,524779869 | 0,006511 | S100A4             | S100 calcium binding protein A4 [Source:HGNC Symbol;Acc:10494]                                                          |
| ENSG00000157601 | -1,592258236 | 0,00661  | MX1                | myxovirus (influenza virus) resistance 1, interferon-inducible protein p78 (mouse) [Source:HGNC Symbol;Acc:7532]        |
| ENSG00000116663 | -1,975343242 | 0,006653 | FBXO6              | F-box protein 6 [Source:HGNC Symbol;Acc:13585]                                                                          |

|                 |              |          |          |                                                                                                                             |
|-----------------|--------------|----------|----------|-----------------------------------------------------------------------------------------------------------------------------|
| ENSG00000143869 | -2,352235668 | 0,007644 | GDF7     | growth differentiation factor 7 [Source:HGNC Symbol;Acc:4222]                                                               |
| ENSG00000043143 | -1,539625099 | 0,007827 | PHF15    | PHD finger protein 15 [Source:HGNC Symbol;Acc:22984]                                                                        |
| ENSG00000139178 | -1,781552064 | 0,00797  | C1RL     | complement component 1, r subcomponent-like [Source:HGNC Symbol;Acc:21265]                                                  |
| ENSG00000110025 | -1,676106678 | 0,008405 | SNX15    | sorting nexin 15 [Source:HGNC Symbol;Acc:14978]                                                                             |
| ENSG00000140043 | 1,711593963  | 0,00896  | PTGR2    | prostaglandin reductase 2 [Source:HGNC Symbol;Acc:20149]                                                                    |
| ENSG00000203896 | 2,274683912  | 0,00943  | LIME1    | Lck interacting transmembrane adaptor 1 [Source:HGNC Symbol;Acc:26016]                                                      |
| ENSG00000171227 | -1,871566213 | 0,010145 | TMEM37   | transmembrane protein 37 [Source:HGNC Symbol;Acc:18216]                                                                     |
| ENSG00000078401 | -2,248434668 | 0,011038 | EDN1     | endothelin 1 [Source:HGNC Symbol;Acc:3176]                                                                                  |
| ENSG00000106366 | -5,368341207 | 0,012143 | SERPINE1 | serpin peptidase inhibitor, clade E (nexin, plasminogen activator inhibitor type 1), member 1 [Source:HGNC Symbol;Acc:8583] |
| ENSG00000130770 | 1,693844876  | 0,012168 | ATPIF1   | ATPase inhibitory factor 1 [Source:HGNC Symbol;Acc:871]                                                                     |
| ENSG00000175899 | -1,774679453 | 0,012486 | A2M      | alpha-2-macroglobulin [Source:HGNC Symbol;Acc:7]                                                                            |
| ENSG00000168906 | -1,661214278 | 0,013907 | MAT2A    | methionine adenosyltransferase II, alpha [Source:HGNC Symbol;Acc:6904]                                                      |
| ENSG00000123992 | -1,509117728 | 0,014185 | DNPEP    | aspartyl aminopeptidase [Source:HGNC Symbol;Acc:2981]                                                                       |
| ENSG00000150593 | -1,416564145 | 0,01466  | PDCD4    | programmed cell death 4 (neoplastic transformation inhibitor) [Source:HGNC Symbol;Acc:8763]                                 |
| ENSG00000123836 | -1,75985845  | 0,01472  | PFKFB2   | 6-phosphofructo-2-kinase/fructose-2,6-biphosphatase 2 [Source:HGNC Symbol;Acc:8873]                                         |
| ENSG00000057252 | -1,537212715 | 0,01501  | SOAT1    | sterol O-acyltransferase 1 [Source:HGNC Symbol;Acc:11177]                                                                   |
| ENSG00000172936 | -1,633007169 | 0,016684 | MYD88    | myeloid differentiation primary response 88 [Source:HGNC Symbol;Acc:7562]                                                   |
| ENSG00000178096 | 1,807580532  | 0,020571 | BOLA1    | bolA homolog 1 (E. coli) [Source:HGNC Symbol;Acc:24263]                                                                     |
| ENSG00000163739 | -1,659297907 | 0,026381 | CXCL1    | chemokine (C-X-C motif) ligand 1 (melanoma growth stimulating activity, alpha) [Source:HGNC Symbol;Acc:4602]                |
| ENSG00000172575 | -2,138770169 | 0,027976 | RASGRP1  | RAS guanyl releasing protein 1 (calcium and DAG-regulated) [Source:HGNC Symbol;Acc:9878]                                    |
| ENSG00000064989 | -2,014143567 | 0,028037 | CALCRL   | calcitonin receptor-like [Source:HGNC Symbol;Acc:16709]                                                                     |
| ENSG00000170315 | 1,597126581  | 0,028239 | UBB      | ubiquitin B [Source:HGNC Symbol;Acc:12463]                                                                                  |
| ENSG00000120334 | 1,960688215  | 0,029363 | CENPL    | centromere protein L [Source:HGNC Symbol;Acc:17879]                                                                         |
| ENSG00000179094 | -1,790591258 | 0,033142 | PER1     | period circadian clock 1 [Source:HGNC Symbol;Acc:8845]                                                                      |
| ENSG00000171612 | 2,015220867  | 0,038717 | SLC25A33 | solute carrier family 25 (pyrimidine nucleotide carrier), member 33 [Source:HGNC Symbol;Acc:29681]                          |
| ENSG00000077157 | -1,514501151 | 0,044057 | PPP1R12B | protein phosphatase 1, regulatory subunit 12B [Source:HGNC Symbol;Acc:7619]                                                 |
| ENSG00000049192 | -1,736398196 | 0,046526 | ADAMTS6  | ADAM metallopeptidase with thrombospondin type 1 motif, 6 [Source:HGNC Symbol;Acc:222]                                      |
| ENSG00000175334 | 1,513629474  | 0,048305 | BANF1    | barrier to autointegration factor 1 [Source:HGNC Symbol;Acc:17397]                                                          |

**HIF1A target genes**

| <b>Gene ID</b>  | <b>FOLD CHANGE</b> | <b>PVALUE</b> | <b>Official Gene Symbol</b> | <b>Gene description</b>                                                                                |
|-----------------|--------------------|---------------|-----------------------------|--------------------------------------------------------------------------------------------------------|
| ENSG00000167772 | 5,151319832        | 2,74E-07      | ANGPTL4                     | angiopoietin-like 4 [Source:HGNC Symbol;Acc:16039]                                                     |
| ENSG00000129521 | 2,60279642         | 2,65E-05      | EGLN3                       | egl nine homolog 3 (C. elegans) [Source:HGNC Symbol;Acc:14661]                                         |
| ENSG00000140939 | 1,690367742        | 0,000374      | NOL3                        | nucleolar protein 3 (apoptosis repressor with CARD domain) [Source:HGNC Symbol;Acc:7869]               |
| ENSG00000005448 | 2,119107265        | 0,000655      | WDR54                       | WD repeat domain 54 [Source:HGNC Symbol;Acc:25770]                                                     |
| ENSG00000240972 | 2,139485552        | 0,000657      | MIF                         | macrophage migration inhibitory factor (glycosylation-inhibiting factor) [Source:HGNC Symbol;Acc:7097] |
| ENSG00000160180 | 3,573743489        | 0,000713      | TFF3                        | trefoil factor 3 (intestinal) [Source:HGNC Symbol;Acc:11757]                                           |
| ENSG00000130037 | 4,309036491        | 0,000929      | KCNA5                       | potassium voltage-gated channel, shaker-related subfamily, member 5 [Source:HGNC Symbol;Acc:6224]      |
| ENSG00000143196 | 1,65191181         | 0,001158      | DPT                         | dermatopontin [Source:HGNC Symbol;Acc:3011]                                                            |
| ENSG00000148926 | 2,799876566        | 0,001285      | ADM                         | adrenomedullin [Source:HGNC Symbol;Acc:259]                                                            |
| ENSG00000088986 | 1,582952243        | 0,00184       | DYNLL1                      | dynein, light chain, LC8-type 1 [Source:HGNC Symbol;Acc:15476]                                         |
| ENSG00000146674 | 2,007363671        | 0,006609      | IGFBP3                      | insulin-like growth factor binding protein 3 [Source:HGNC Symbol;Acc:5472]                             |
| ENSG00000134013 | 1,908349554        | 0,006964      | LOXL2                       | lysyl oxidase-like 2 [Source:HGNC Symbol;Acc:6666]                                                     |
| ENSG00000110092 | 1,332913178        | 0,007766      | CCND1                       | cyclin D1 [Source:HGNC Symbol;Acc:1582]                                                                |
| ENSG00000134369 | 1,672724383        | 0,01448       | NAV1                        | neuron navigator 1 [Source:HGNC Symbol;Acc:15989]                                                      |
| ENSG00000196981 | 1,674612943        | 0,020648      | WDR5B                       | WD repeat domain 5B [Source:HGNC Symbol;Acc:17826]                                                     |
| ENSG00000167397 | 1,589160358        | 0,024701      | VKORC1                      | vitamin K epoxide reductase complex, subunit 1 [Source:HGNC Symbol;Acc:23663]                          |
| ENSG00000104415 | 4,299010067        | 0,037983      | WISP1                       | WNT1 inducible signaling pathway protein 1 [Source:HGNC Symbol;Acc:12769]                              |
