# Supplementary material for: Gene expression network analysis reveals new transcriptional regulators as novel factors in human ischemic cardiomyopathy
Source: PubMed Central journal article supplement (PMC4386080; doi:10.1186/s12920-015-0088-y), 2015-03-29
Supplement: 12920_2015_88_MOESM5_ESM.pdf [file 12920_2015_88_MOESM5_ESM.pdf]

GO terms associated with CEBPD downstream genes downregulated in the RNA-Seq Data

| Go terms                                                                 | Gene count | Fold Enrichment | p-Value  |
|--------------------------------------------------------------------------|------------|-----------------|----------|
| regulation of cell proliferation                                         | 9          | 8,1             | 3,90E-06 |
| positive regulation of cellular process                                  | 12         | 4,6             | 5,10E-06 |
| positive regulation of biological process                                | 12         | 4,2             | 1,30E-05 |
| system development                                                       | 12         | 3,6             | 5,00E-05 |
| anatomical structure development                                         | 12         | 3,4             | 1,10E-04 |
| organ development                                                        | 10         | 4,1             | 1,80E-04 |
| positive regulation of immune system process                             | 5          | 14,8            | 2,50E-04 |
| multicellular organismal development                                     | 12         | 3               | 3,50E-04 |
| positive regulation of cell activation                                   | 4          | 25,4            | 4,20E-04 |
| regulation of response to stress                                         | 5          | 12,9            | 4,30E-04 |
| response to wounding                                                     | 6          | 8               | 5,50E-04 |
| developmental process                                                    | 12         | 2,7             | 8,30E-04 |
| regulation of multicellular organismal process                           | 7          | 5,3             | 1,10E-03 |
| positive regulation of T cell proliferation                              | 3          | 54,3            | 1,20E-03 |
| regulation of leukocyte activation                                       | 4          | 17              | 1,30E-03 |
| regulation of cellular process                                           | 17         | 1,8             | 1,40E-03 |
| negative regulation of biological process                                | 9          | 3,5             | 1,50E-03 |
| regulation of cell activation                                            | 4          | 16,1            | 1,60E-03 |
| regulation of cell division                                              | 3          | 45,1            | 1,80E-03 |
| regulation of biological process                                         | 17         | 1,7             | 2,40E-03 |
| reproduction                                                             | 6          | 5,5             | 2,90E-03 |
| regulation of response to stimulus                                       | 5          | 7,6             | 3,00E-03 |
| multicellular organismal process                                         | 13         | 2,1             | 3,10E-03 |
| negative regulation of cellular process                                  | 8          | 3,4             | 4,30E-03 |
| response to stress                                                       | 8          | 3,4             | 4,70E-03 |
| biological regulation                                                    | 17         | 1,6             | 4,80E-03 |
| reproductive developmental process                                       | 4          | 10,8            | 4,90E-03 |
| regulation of lymphocyte proliferation                                   | 3          | 25,5            | 5,50E-03 |
| positive regulation of developmental process                             | 4          | 10,2            | 5,80E-03 |
| response to external stimulus                                            | 6          | 4,6             | 6,10E-03 |
| signal transduction                                                      | 10         | 2,5             | 6,90E-03 |
| positive regulation of molecular function                                | 5          | 6               | 6,90E-03 |
| regulation of molecular function                                         | 6          | 4,4             | 7,80E-03 |
| cell surface receptor linked signal transduction                         | 8          | 3               | 8,00E-03 |
| immune system process                                                    | 6          | 4,2             | 8,80E-03 |
| inflammatory response                                                    | 4          | 8,7             | 8,90E-03 |
| anatomical structure formation involved in morphogenesis                 | 4          | 8               | 1,10E-02 |
| negative regulation of apoptosis                                         | 4          | 8               | 1,10E-02 |
| regulation of developmental process                                      | 5          | 5,2             | 1,10E-02 |
| negative regulation of programmed cell death                             | 4          | 7,9             | 1,20E-02 |
| negative regulation of cell death                                        | 4          | 7,8             | 1,20E-02 |
| negative regulation of cell proliferation                                | 4          | 7,8             | 1,20E-02 |
| positive regulation of alpha-beta T cell proliferation                   | 2          | 156,8           | 1,20E-02 |
| positive regulation of stress-activated MAPK cascade                     | 2          | 156,8           | 1,20E-02 |
| reproductive structure development                                       | 3          | 16,8            | 1,20E-02 |
| nervous system development                                               | 6          | 3,9             | 1,30E-02 |
| regulation of stress-activated MAPK cascade                              | 2          | 141,2           | 1,30E-02 |
| positive regulation of cell-cell adhesion                                | 2          | 128,3           | 1,50E-02 |
| regulation of defense response                                           | 3          | 14,8            | 1,60E-02 |
| cell differentiation                                                     | 7          | 3               | 1,70E-02 |
| sex differentiation                                                      | 3          | 14              | 1,70E-02 |
| regulation of alpha-beta T cell proliferation                            | 2          | 108,6           | 1,70E-02 |
| regulation of binding                                                    | 3          | 13,8            | 1,80E-02 |
| anatomical structure morphogenesis                                       | 6          | 3,5             | 1,80E-02 |
| regulation of response to external stimulus                              | 3          | 13,3            | 1,90E-02 |
| regulation of chemokine production                                       | 2          | 94,1            | 2,00E-02 |
| cellular developmental process                                           | 7          | 2,9             | 2,10E-02 |
| positive regulation of JNK cascade                                       | 2          | 83              | 2,30E-02 |
| regulation of catalytic activity                                         | 5          | 4,2             | 2,40E-02 |
| positive regulation of interleukin-6 production                          | 2          | 74,3            | 2,50E-02 |
| reproductive process in a multicellular organism                         | 4          | 5,8             | 2,60E-02 |
| multicellular organism reproduction                                      | 4          | 5,8             | 2,60E-02 |
| wound healing                                                            | 3          | 11,1            | 2,70E-02 |
| regulation of cell differentiation                                       | 4          | 5,7             | 2,70E-02 |
| positive regulation of stress-activated protein kinase signaling pathway | 2          | 67,2            | 2,80E-02 |
| regulation of cell-cell adhesion                                         | 2          | 64,2            | 2,90E-02 |
| anti-apoptosis                                                           | 3          | 10,3            | 3,10E-02 |
| positive regulation of catalytic activity                                | 4          | 5,4             | 3,10E-02 |
| blood vessel morphogenesis                                               | 3          | 10              | 3,20E-02 |

|                                                         |   |      |          |
|---------------------------------------------------------|---|------|----------|
| heart development                                       | 3 | 9,8  | 3,30E-02 |
| regulation of anatomical structure morphogenesis        | 3 | 9,7  | 3,40E-02 |
| tube development                                        | 3 | 9,6  | 3,50E-02 |
| regulation of immune response                           | 3 | 9,4  | 3,60E-02 |
| positive regulation of cell differentiation             | 3 | 9,2  | 3,70E-02 |
| organ morphogenesis                                     | 4 | 5    | 3,80E-02 |
| positive regulation of response to stimulus             | 3 | 9    | 3,90E-02 |
| embryo implantation                                     | 2 | 47,1 | 4,00E-02 |
| regulation of interleukin-2 production                  | 2 | 47,1 | 4,00E-02 |
| positive regulation of smooth muscle cell proliferation | 2 | 45,5 | 4,10E-02 |
| positive regulation of adaptive immune response         | 2 | 45,5 | 4,10E-02 |
| positive regulation of multicellular organismal process | 3 | 8,7  | 4,20E-02 |
| blood vessel development                                | 3 | 8,6  | 4,20E-02 |
| vasculature development                                 | 3 | 8,4  | 4,40E-02 |
| regulation of interleukin-6 production                  | 2 | 39,2 | 4,70E-02 |
| defense response                                        | 4 | 4,6  | 4,70E-02 |
| pattern specification process                           | 3 | 7,9  | 4,90E-02 |

GO terms associated with BCL3 downstream genes downregulated in the RNA-Seq Data

| Go terms                                                                            | Gene count | Fold Enrichment | p-Value  |
|-------------------------------------------------------------------------------------|------------|-----------------|----------|
| response to external stimulus                                                       | 15         | 3,6             | 4,70E-05 |
| regulation of molecular function                                                    | 15         | 3,4             | 8,80E-05 |
| defense response                                                                    | 12         | 4,2             | 8,90E-05 |
| response to stimulus                                                                | 31         | 1,9             | 1,00E-04 |
| response to stress                                                                  | 20         | 2,6             | 1,10E-04 |
| response to wounding                                                                | 11         | 4,5             | 1,20E-04 |
| response to chemical stimulus                                                       | 17         | 2,9             | 1,40E-04 |
| response to biotic stimulus                                                         | 9          | 5,1             | 3,30E-04 |
| positive regulation of biological process                                           | 21         | 2,2             | 4,50E-04 |
| regulation of metabolic process                                                     | 30         | 1,8             | 5,00E-04 |
| regulation of cellular metabolic process                                            | 29         | 1,8             | 5,80E-04 |
| regulation of primary metabolic process                                             | 28         | 1,8             | 6,10E-04 |
| inflammatory response                                                               | 8          | 5,3             | 6,50E-04 |
| regulation of cell proliferation                                                    | 12         | 3,3             | 7,40E-04 |
| negative regulation of biological process                                           | 19         | 2,3             | 8,60E-04 |
| positive regulation of cellular process                                             | 19         | 2,2             | 1,10E-03 |
| regulation of response to stimulus                                                  | 9          | 4,2             | 1,10E-03 |
| pathway-restricted SMAD protein phosphorylation                                     | 3          | 54,3            | 1,30E-03 |
| regulation of catalytic activity                                                    | 12         | 3,1             | 1,30E-03 |
| response to organic substance                                                       | 11         | 3,3             | 1,40E-03 |
| regulation of response to stress                                                    | 7          | 5,5             | 1,50E-03 |
| response to virus                                                                   | 5          | 10              | 1,50E-03 |
| response to other organism                                                          | 7          | 5,2             | 2,00E-03 |
| negative regulation of cellular process                                             | 17         | 2,2             | 2,50E-03 |
| multi-organism process                                                              | 10         | 3,2             | 3,40E-03 |
| negative regulation of molecular function                                           | 7          | 4,6             | 4,00E-03 |
| regulation of muscle contraction                                                    | 4          | 12,1            | 4,20E-03 |
| regulation of nucleobase, nucleoside, nucleotide and nucleic acid metabolic process | 23         | 1,8             | 4,80E-03 |
| positive regulation of molecular function                                           | 9          | 3,3             | 4,80E-03 |
| regulation of nitrogen compound metabolic process                                   | 23         | 1,8             | 5,40E-03 |
| regulation of response to external stimulus                                         | 5          | 6,8             | 5,80E-03 |
| response to hormone stimulus                                                        | 7          | 4,1             | 6,30E-03 |
| chemical homeostasis                                                                | 8          | 3,4             | 8,30E-03 |
| regulation of cellular biosynthetic process                                         | 23         | 1,7             | 8,40E-03 |
| positive regulation of smooth muscle cell proliferation                             | 3          | 21              | 8,60E-03 |
| regulation of biosynthetic process                                                  | 23         | 1,7             | 9,10E-03 |
| regulation of biological process                                                    | 43         | 1,3             | 9,60E-03 |
| response to endogenous stimulus                                                     | 7          | 3,8             | 9,90E-03 |
| transmembrane receptor protein serine/threonine kinase signaling pathway            | 4          | 8,4             | 1,10E-02 |
| regulation of transcription factor activity                                         | 4          | 8,4             | 1,10E-02 |
| regulation of system process                                                        | 6          | 4,2             | 1,30E-02 |
| regulation of macromolecule metabolic process                                       | 24         | 1,6             | 1,40E-02 |
| biological regulation                                                               | 44         | 1,3             | 1,50E-02 |
| negative regulation of cellular metabolic process                                   | 9          | 2,7             | 1,60E-02 |
| regulation of nucleotide metabolic process                                          | 4          | 7,5             | 1,60E-02 |
| regulation of DNA binding                                                           | 4          | 7,2             | 1,80E-02 |
| response to glucose stimulus                                                        | 3          | 14,5            | 1,80E-02 |
| regulation of smooth muscle cell proliferation                                      | 3          | 14,2            | 1,80E-02 |
| regulation of phosphorylation                                                       | 7          | 3,3             | 1,90E-02 |
| response to hexose stimulus                                                         | 3          | 13,9            | 1,90E-02 |
| response to monosaccharide stimulus                                                 | 3          | 13,9            | 1,90E-02 |
| homeostatic process                                                                 | 9          | 2,6             | 2,00E-02 |
| regulation of phosphorus metabolic process                                          | 7          | 3,1             | 2,20E-02 |
| regulation of phosphate metabolic process                                           | 7          | 3,1             | 2,20E-02 |
| mesenchymal cell development                                                        | 3          | 12,8            | 2,20E-02 |
| mesenchymal cell differentiation                                                    | 3          | 12,8            | 2,20E-02 |
| regulation of macromolecule biosynthetic process                                    | 21         | 1,6             | 2,20E-02 |
| regulation of kinase activity                                                       | 6          | 3,6             | 2,30E-02 |
| mesenchyme development                                                              | 3          | 12,5            | 2,30E-02 |
| negative regulation of metabolic process                                            | 9          | 2,5             | 2,40E-02 |
| regulation of multicellular organismal process                                      | 10         | 2,3             | 2,50E-02 |
| peptide transport                                                                   | 3          | 12,1            | 2,50E-02 |
| response to nutrient                                                                | 4          | 6,2             | 2,60E-02 |
| regulation of transferase activity                                                  | 6          | 3,5             | 2,70E-02 |
| response to mechanical stimulus                                                     | 3          | 11,6            | 2,70E-02 |
| B cell mediated immunity                                                            | 3          | 11,6            | 2,70E-02 |
| cellular cation homeostasis                                                         | 5          | 4,3             | 2,80E-02 |
| positive regulation of catalytic activity                                           | 7          | 2,9             | 3,00E-02 |
| transforming growth factor beta receptor signaling pathway                          | 3          | 10,9            | 3,00E-02 |

|                                                                                           |    |      |          |
|-------------------------------------------------------------------------------------------|----|------|----------|
| response to carbohydrate stimulus                                                         | 3  | 10,9 | 3,00E-02 |
| regulation of binding                                                                     | 4  | 5,7  | 3,20E-02 |
| positive regulation of cellular biosynthetic process                                      | 8  | 2,5  | 3,50E-02 |
| taxis                                                                                     | 4  | 5,4  | 3,60E-02 |
| chemotaxis                                                                                | 4  | 5,4  | 3,60E-02 |
| regulation of protein metabolic process                                                   | 7  | 2,8  | 3,70E-02 |
| negative regulation of catalytic activity                                                 | 5  | 3,9  | 3,70E-02 |
| positive regulation of biosynthetic process                                               | 8  | 2,5  | 3,70E-02 |
| regulation of transcription                                                               | 19 | 1,6  | 3,70E-02 |
| regeneration                                                                              | 3  | 9,4  | 3,90E-02 |
| positive regulation of cell proliferation                                                 | 6  | 3,1  | 3,90E-02 |
| cation homeostasis                                                                        | 5  | 3,8  | 4,10E-02 |
| negative regulation of nucleotide metabolic process                                       | 2  | 43,4 | 4,40E-02 |
| positive regulation of cellular metabolic process                                         | 9  | 2,2  | 4,40E-02 |
| regulation of protein modification process                                                | 5  | 3,7  | 4,50E-02 |
| regulation of gene expression                                                             | 20 | 1,5  | 4,60E-02 |
| negative regulation of macromolecule metabolic process                                    | 8  | 2,4  | 4,80E-02 |
| adaptive immune response                                                                  | 3  | 8,5  | 4,80E-02 |
| adaptive immune response based on somatic recombination of immune receptors built from in | 3  | 8,5  | 4,80E-02 |
| regulation of cellular process                                                            | 39 | 1,2  | 4,90E-02 |

GO terms associated with HIF1A downstream genes upregulated in the RNA-Seq Data

| Go terms                                       | Gene count | Fold Enrichment | p-Value  |
|------------------------------------------------|------------|-----------------|----------|
| response to hypoxia                            | 5          | 32,9            | 9,80E-06 |
| response to oxygen levels                      | 5          | 31,3            | 1,20E-05 |
| response to chemical stimulus                  | 8          | 5,5             | 1,70E-04 |
| negative regulation of biological process      | 9          | 4,4             | 2,00E-04 |
| negative regulation of cellular process        | 8          | 4,3             | 8,40E-04 |
| response to stress                             | 8          | 4,2             | 9,20E-04 |
| regulation of cell proliferation               | 5          | 5,6             | 8,00E-03 |
| response to endogenous stimulus                | 4          | 8,7             | 8,30E-03 |
| regulation of apoptosis                        | 5          | 5,5             | 8,60E-03 |
| regulation of programmed cell death            | 5          | 5,4             | 8,90E-03 |
| regulation of cell death                       | 5          | 5,4             | 9,00E-03 |
| protein oligomerization                        | 3          | 15,2            | 1,40E-02 |
| regulation of multicellular organismal process | 5          | 4,7             | 1,50E-02 |
| response to stimulus                           | 9          | 2,3             | 1,60E-02 |
| organ regeneration                             | 2          | 67,9            | 2,70E-02 |
| response to organic substance                  | 4          | 4,9             | 3,80E-02 |
| negative regulation of phosphorylation         | 2          | 39,2            | 4,70E-02 |
